# Supplementary material
Source: PubMed Central journal article supplement (PMC3696928)
Supplement: Supp_Fig2.pdf [file Supp_Fig2.pdf]

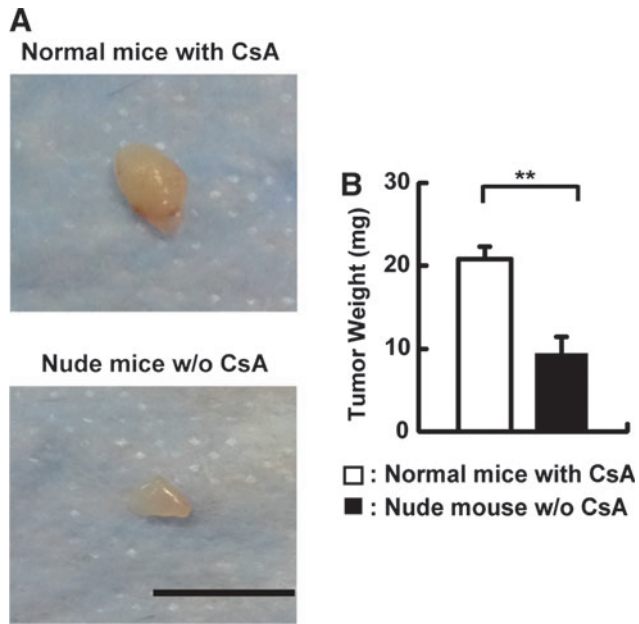

**SUPPLEMENTARY FIG. S2.** Effect of cyclosporin A on tumor formation. **(A)** GBM#1 ( $1 \times 10^6$  cells) in 100  $\mu$ L of Matrigel was inoculated subcutaneously into the normal mouse (*top left*) and nude mouse (*bottom left*) back skin. **(B)** After 18 days post-transplantation, tumors were harvested, and tumor weights were measured (*right graph*). *White bar:* GBM#1 transplanted into normal mice with cyclosporin A (CysA) treatment; *black bar:* GBM#1 transplanted into nude mice w/o CysA treatment. Scale bar indicates 1 mm (\*\* $P < 0.01$ ).
